# Supplementary material for: Moderate‐to‐Vigorous Physical Activity and All‐Cause Mortality: Do Bouts Matter?
Source: PubMed Central journal article supplement — J Am Heart Assoc. 2018 Mar 22;7(6):e007678. doi: 10.1161/JAHA.117.007678 (PMC5907548; doi:10.1161/jaha.117.007678), 2018-03-22
Supplement: JAH3-7-e007678-s001.pdf [file JAH3-7-e007678-s001.pdf]

# **SUPPLEMENTAL MATERIAL**

**Table S1. Weighted U.S. adult distributions of total time per day spent in sedentary, light, and moderate-to-vigorous physical activity across quartiles of total and bouts moderate-to-vigorous physical activity.**

| MVPA quartiles                    | N    | Sedentary (AC<100)<br>Mean Hours (SE) | Light PA (100≤AC<760)<br>Mean Hours (SE) | MVPA (AC≥760)<br>Mean Minutes (SE) |
|-----------------------------------|------|---------------------------------------|------------------------------------------|------------------------------------|
| <b>Total MVPA#</b>                |      |                                       |                                          |                                    |
| MVPA ≤40.2                        | 1178 | 9.63 (0.09)                           | 3.30 (0.05)                              | 22.33 (0.38)                       |
| 40.2< MVPA ≤79.5                  | 1226 | 8.79 (0.07)                           | 4.14 (0.04)                              | 61.00 (0.37)                       |
| 79.5< MVPA ≤123.4                 | 1229 | 8.13 (0.06)                           | 4.38 (0.03)                              | 100.93 (0.52)                      |
| MVPA >123.4                       | 1207 | 6.96 (0.07)                           | 4.74 (0.03)                              | 174.97 (1.57)                      |
| <b>Bouted MVPA (≥5 minutes)#</b>  |      |                                       |                                          |                                    |
| MVPA ≤10.7                        | 1191 | 9.50 (0.09)                           | 3.47 (0.05)                              | 25.47 (0.46)                       |
| 10.7< MVPA ≤34.3                  | 1222 | 8.68 (0.07)                           | 4.22 (0.04)                              | 64.43 (0.65)                       |
| 34.3< MVPA ≤70.7                  | 1222 | 8.17 (0.07)                           | 4.39 (0.04)                              | 101.53 (0.76)                      |
| MVPA >70.7                        | 1205 | 7.02 (0.06)                           | 4.60 (0.03)                              | 173.80 (1.60)                      |
| <b>Bouted MVPA (≥10 minutes)#</b> |      |                                       |                                          |                                    |
| MVPA ≤0.0                         | 1772 | 8.85 (0.07)                           | 3.91 (0.05)                              | 50.39 (1.56)                       |
| 0.0< MVPA ≤5.1                    | 651  | 8.56 (0.10)                           | 4.42 (0.04)                              | 79.82 (1.60)                       |
| 5.1< MVPA ≤20.5                   | 1220 | 8.09 (0.06)                           | 4.39 (0.03)                              | 105.45 (1.64)                      |
| MVPA >20.5                        | 1197 | 7.42 (0.07)                           | 4.37 (0.03)                              | 159.37 (1.95)                      |

#in minutes/day

MVPA: moderate-to-vigorous physical activity

SE: standard error

AC: activity counts

**Table S2. Hazard ratios for quartiles of total, 5-min, and 10-min bouts MVPA.**

|                                      | <b>Model 1</b>         | <b>Model 2</b>         |
|--------------------------------------|------------------------|------------------------|
| <b>Total MVPA<sup>#</sup></b>        | Hazard Ratios (95% CI) | Hazard Ratios (95% CI) |
| MVPA ≤40.2                           | 1.00 (REF)             | 1.00 (REF)             |
| 40.2 < MVPA ≤79.5                    | 0.20 (0.15, 0.26)      | 0.43 (0.35, 0.54)      |
| 79.5 < MVPA ≤123.4                   | 0.08 (0.05, 0.11)      | 0.24 (0.17, 0.35)      |
| MVPA >123.4                          | 0.07 (0.05, 0.11)      | 0.27 (0.16, 0.45)      |
| <b>5-min bouts MVPA<sup>#</sup></b>  |                        |                        |
| MVPA ≤10.7                           | 1.00 (REF)             | 1.00 (REF)             |
| 10.7 < MVPA ≤34.3                    | 0.21 (0.15, 0.29)      | 0.42 (0.30, 0.59)      |
| 34.3 < MVPA ≤70.7                    | 0.10 (0.07, 0.12)      | 0.26 (0.21, 0.34)      |
| MVPA >70.7                           | 0.08 (0.06, 0.12)      | 0.28 (0.17, 0.45)      |
| <b>10-min bouts MVPA<sup>#</sup></b> |                        |                        |
| MVPA ≤0.0                            | 1.00 (REF)             | 1.00 (REF)             |
| 0.0 < MVPA ≤5.1                      | 0.32 (0.25, 0.41)      | 0.44 (0.33, 0.60)      |
| 5.1 < MVPA ≤20.5                     | 0.21 (0.16, 0.29)      | 0.39 (0.27, 0.58)      |
| MVPA >20.5                           | 0.16 (0.11, 0.23)      | 0.35 (0.23, 0.53)      |

<sup>#</sup>in minutes/day

MVPA: moderate-to-vigorous physical activity

95% CI: 95% confidence intervals

REF: referent group

Model 1: Unadjusted model including total MVPA, 5-min bouts MVPA, or 10-min bouts MVPA

Model 2: Model 1 adjusted for age, sex, race-ethnicity, education, alcohol consumption, smoking status, BMI, and self-reported diagnosis of diabetes, coronary artery disease, stroke, cancer, and mobility limitation
